# Supplementary material for: A smartphone-based quantitative detection platform of mycotoxins based on multiple-color upconversion nanoparticles
Source: Royal Society of Chemistry journal article supplement (doi:10.1039/c8nr04138e), 2018-01-01
Supplement: c8nr04138e1.pdf [file c8nr04138e1.pdf]

# **A smartphone quantitative detection platform of mycotoxins based on multiple-color upconversion nanoparticles**

*Minye Yang<sup>a</sup>, Ying Zhang<sup>a</sup>, Meihui Cui<sup>a</sup>, Yu Tian<sup>a</sup>, Shufang Zhang<sup>b</sup>, Kang Peng<sup>b</sup>, Hongshuang Xu<sup>b</sup>, Zhenyu Liao<sup>c,\*</sup>, Hanjie Wang<sup>a,\*</sup>, Jin Chang<sup>a</sup>,*

<sup>a</sup> College of Life Sciences, Tianjin University. Tianjin Engineering Center of Micro-Nano Biomaterials and Detection-Treatment Technology, Tianjin 300072, People's Republic of China.

<sup>b</sup> School of Electrical and Information Engineering. Tianjin University. Tianjin 300072, People's Republic of China.

<sup>c</sup> The National Center of Supervision and Inspection for Quality of Food, Tianjin Product Quality Inspection Technology Research Institute, Tianjin, 300384, People's Republic of China.

Corresponding authors.

E-mail addresses: [wanghj@tju.edu.cn](mailto:wanghj@tju.edu.cn) (Hanjie Wang), [liaozy08@163.com](mailto:liaozy08@163.com) (Zhenyu Liao)

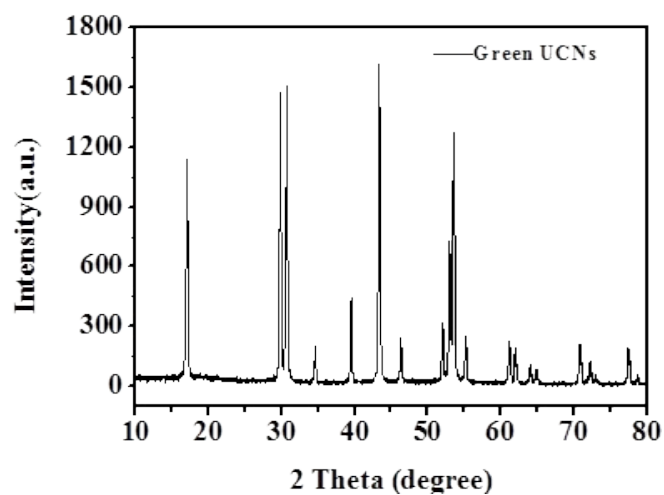

Supporting Information Fig S1. The structure of green emission UCNs measured by the X-ray diffraction (XRD).

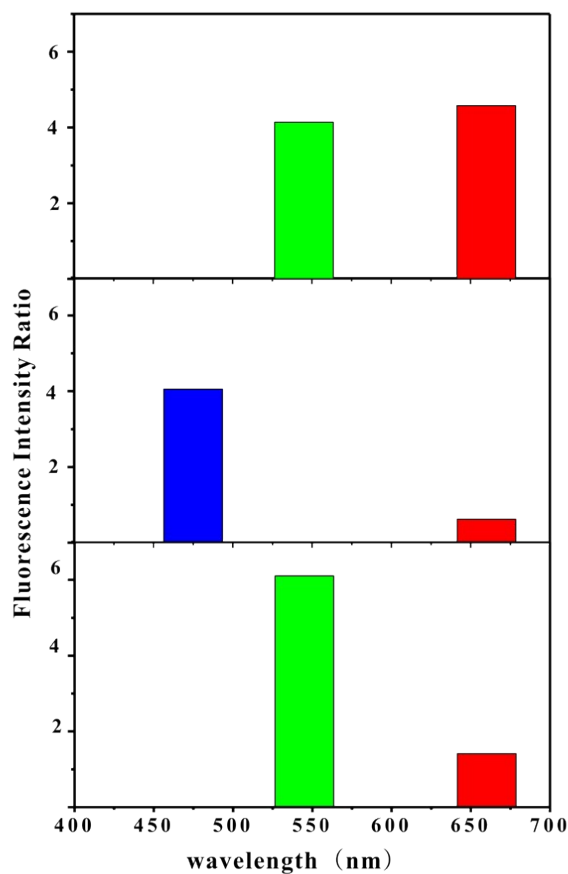

Supporting Information Fig S2. Fluorescence intensity ratio statistics of red/green/blue emission UCNs

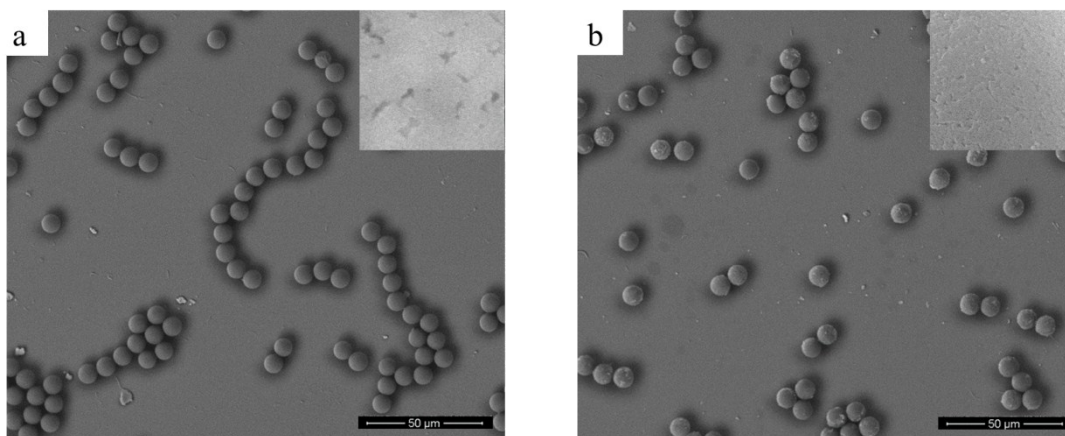

Supporting Information Fig S2. The morphology of empty microspheres(a) and upconversion nanoparticles encoded microspheres (UCNMs) (b) characterized by scanning electron microscope (SEM).

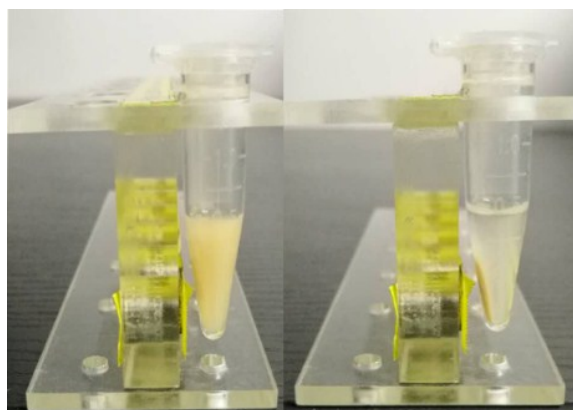

Supporting Information Fig S4. The magnetic separation performance of UCNMs. After 2 min, UCNMs were collected in the magnetic separation rack.

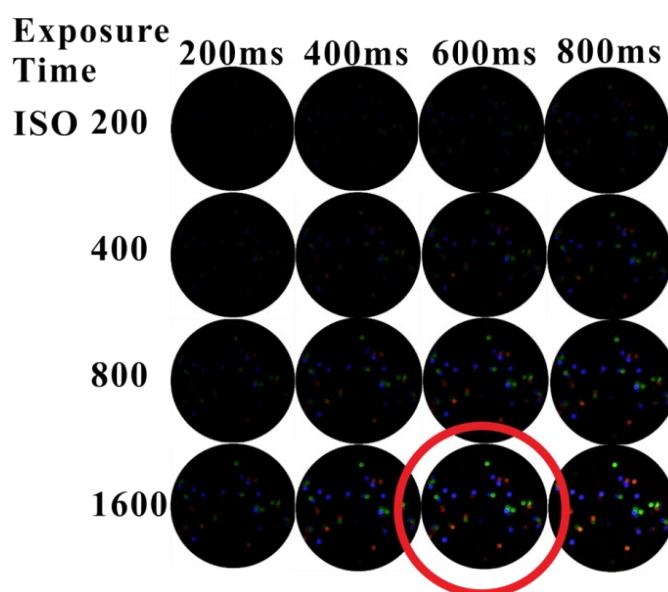

Supporting Information Fig S5. The influence of sensitivity (ISO) and exposure time and when the value of ISO was 1600 and exposure time was 600ms, the effect would be the best.

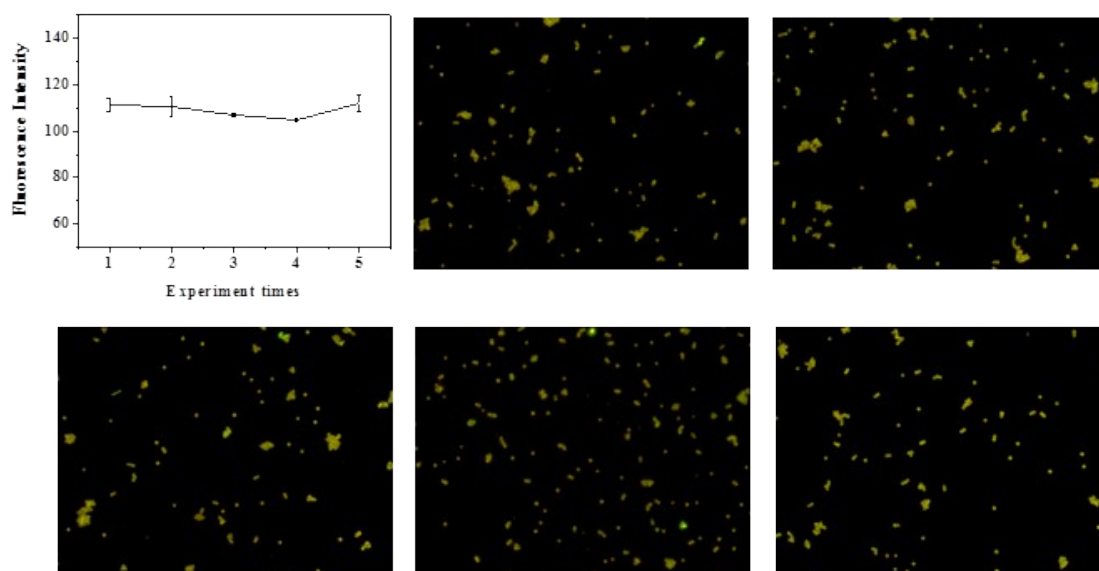

Supporting Information Fig S6. The reproducibility of UCNMs-based sensor and the fluorescence intensity in the 5 experiments were

111.30235, 110.34715, 107.2094, 104.81405, 111.9784 respectively.

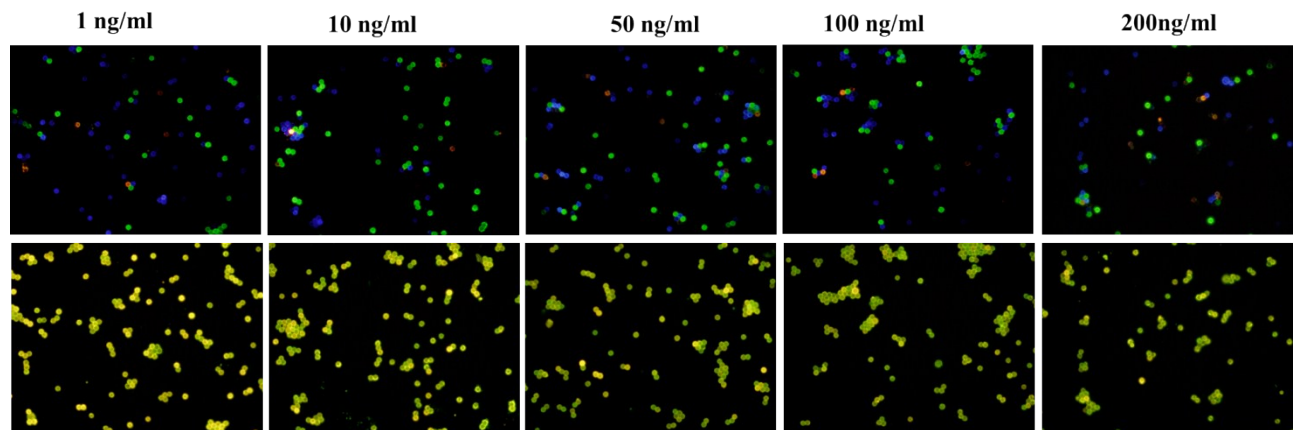

Supporting Information Fig S7. The multiplex detection of mycotoxins by traditional fluorescence microscope.
